# Supplementary material for: Point-of-care tests for urinary tract infections: protocol for a systematic review and meta-analysis of diagnostic test accuracy
Source: PubMed Central journal article supplement — BMJ Open. 2020 Jun 3;10(6):e033424. doi: 10.1136/bmjopen-2019-033424 (PMC7282288; doi:10.1136/bmjopen-2019-033424), 2020-06-03
Supplement: bmjopen-2019-033424.draft_revisions.pdf [file bmjopen-2019-033424.draft_revisions.pdf]

# BMJ Open

BMJ Open is committed to open peer review. As part of this commitment we make the peer review history of every article we publish publicly available.

When an article is published we post the peer reviewers' comments and the authors' responses online. We also post the versions of the paper that were used during peer review. These are the versions that the peer review comments apply to.

The versions of the paper that follow are the versions that were submitted during the peer review process. They are not the versions of record or the final published versions. They should not be cited or distributed as the published version of this manuscript.

BMJ Open is an open access journal and the full, final, typeset and author-corrected version of record of the manuscript is available on our site with no access controls, subscription charges or pay-per-view fees (<http://bmjopen.bmj.com>).

If you have any questions on BMJ Open's open peer review process please email [info.bmjopen@bmj.com](mailto:info.bmjopen@bmj.com)

# BMJ Open

## Point-of-care tests for urinary tract infections: Protocol for a systematic review and meta-analysis of diagnostic test accuracy

|                               |                                                                                                                                                                                                                                                                                                                                                                                                                              |
|-------------------------------|------------------------------------------------------------------------------------------------------------------------------------------------------------------------------------------------------------------------------------------------------------------------------------------------------------------------------------------------------------------------------------------------------------------------------|
| Journal:                      | <i>BMJ Open</i>                                                                                                                                                                                                                                                                                                                                                                                                              |
| Manuscript ID                 | bmjopen-2019-033424                                                                                                                                                                                                                                                                                                                                                                                                          |
| Article Type:                 | Protocol                                                                                                                                                                                                                                                                                                                                                                                                                     |
| Date Submitted by the Author: | 05-Aug-2019                                                                                                                                                                                                                                                                                                                                                                                                                  |
| Complete List of Authors:     | <p>Frailé Navarro, David; University of Saint Andrews School of Medicine<br/>Sullivan, Frank; University of St. Andrews, ; North York General hospital,</p> <p>Azcoaga-Lorenzo, Amaya; University of Saint Andrews School of Medicine, Division of Population and Behavioural Sciences<br/>Hernandez Santiago, Virginia; University of Saint Andrews School of Medicine, Division of Population and Behavioural Sciences</p> |
| Keywords:                     | Diagnostic microbiology < INFECTIOUS DISEASES, Epidemiology < INFECTIOUS DISEASES, Molecular diagnostics < INFECTIOUS DISEASES, Urinary tract infections < UROLOGY                                                                                                                                                                                                                                                           |
|                               |                                                                                                                                                                                                                                                                                                                                                                                                                              |

SCHOLARONE™  
Manuscripts

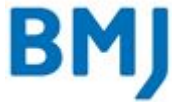

I, the Submitting Author has the right to grant and does grant on behalf of all authors of the Work (as defined in the below author licence), an exclusive licence and/or a non-exclusive licence for contributions from authors who are: i) UK Crown employees; ii) where BMJ has agreed a CC-BY licence shall apply, and/or iii) in accordance with the terms applicable for US Federal Government officers or employees acting as part of their official duties; on a worldwide, perpetual, irrevocable, royalty-free basis to BMJ Publishing Group Ltd ("BMJ") its licensees and where the relevant Journal is co-owned by BMJ to the co-owners of the Journal, to publish the Work in this journal and any other BMJ products and to exploit all rights, as set out in our [licence](#).

The Submitting Author accepts and understands that any supply made under these terms is made by BMJ to the Submitting Author unless you are acting as an employee on behalf of your employer or a postgraduate student of an affiliated institution which is paying any applicable article publishing charge ("APC") for Open Access articles. Where the Submitting Author wishes to make the Work available on an Open Access basis (and intends to pay the relevant APC), the terms of reuse of such Open Access shall be governed by a Creative Commons licence – details of these licences and which [Creative Commons](#) licence will apply to this Work are set out in our licence referred to above.

Other than as permitted in any relevant BMJ Author's Self Archiving Policies, I confirm this Work has not been accepted for publication elsewhere, is not being considered for publication elsewhere and does not duplicate material already published. I confirm all authors consent to publication of this Work and authorise the granting of this licence.

1  
2  
3  
4 **Title:** *Point-of-care* tests for urinary  
5 tract infections: Protocol for a  
6 systematic review and meta-analysis of  
7 diagnostic test accuracy.  
8  
9  
10  
11  
12  
13  
14

15 **Authors:** Fraile Navarro D, Sullivan F, Azcoaga-Lorenzo A, Hernandez-Santiago V

16 **Affiliation:** University of St Andrews  
17  
18

19 Dr David Fraile Navarro, MSc, MBChB  
20 NHS Education Scotland Academic Fellow in General Practice  
21 University of St Andrews, St Andrews  
22 United Kingdom  
23  
24

25 Dr Frank Sullivan, FRCGP PhD  
26 Professor of Primary Care Head of Division Population & Behavioural Science  
27 Medical School Director of Research  
28 University of St Andrews, St Andrews  
29 United Kingdom  
30  
31  
32

33 Dr Amaya Azcoaga Lorenzo, PhD, MBChB  
34 HDR UK Clinical Postdoctoral Fellow  
35 University of St Andrews, St Andrews  
36 United Kingdom  
37  
38  
39

40 Dr Virginia Hernandez-Santiago\*, PhD, MBChB  
41 NRS Clinical Postdoctoral Fellow,  
42 University of St Andrews, St Andrews  
43 United Kingdom  
44  
45  
46  
47  
48  
49

50 \*Corresponding author: Dr Virginia Hernandez-Santiago, [vhs2@st-andrews.ac.uk](mailto:vhs2@st-andrews.ac.uk)  
51  
52  
53  
54  
55  
56  
57  
58  
59  
60

## ABSTRACT: (*BMJ Open Protocol format*)

### Introduction

Urinary tract infections (UTIs) are the second most common type of infection worldwide, accounting for a large number of primary care consultations and antibiotic prescribing. Current diagnosis is based on an empirical approach, relying on symptoms and occasional use of urine dipsticks. The diagnostic gold standard is still urine culture, although it is not routinely recommended for uncomplicated UTIs in the community, due to time to diagnosis (48h). Rapid point-of-care tests have been developed, but their diagnostic accuracy has not been compared. Our objective is to systematically review and meta-analyse the diagnostic accuracy of currently available point-of-care tests for urinary tract infections.

### Methods and analysis

Studies evaluating the diagnostic accuracy of point-of-care tests for urinary tract infections will be included. Pubmed, Web of Science, EMBASE and Cochrane Database of Systematic Reviews were searched from inception to the 1<sup>st</sup> June 2019. Data extraction and risk of bias assessment will be assessed using the Quality Assessment of Diagnostic Accuracy Studies (QUADAS-2) tool. Meta-analysis will be performed depending on data availability and heterogeneity.

### Ethics and dissemination

This is a systematic review protocol and therefore formal ethical approval is not required, as no primary, identifiable, personal data will be collected. Patients or the public were not involved in the design of our research. However, the findings from this review will be shared with key stakeholders, including patient groups, clinicians and guideline developers, and will also be presented at national and international conferences.

### Registration

The protocol is registered in PROSPERO, registration number: CRD42018112019

### Keywords

Systematic Review, Urinary Tract Infections, Infectious Diseases, Diagnostic Accuracy, Point-of-care tests.

## Strengths and limitations of this study

- Antimicrobial resistance is an increasing worldwide public health concern, with resistance among gram-negatives (most common microorganisms in urinary tract infections) being a burden in Europe. Improving diagnosis is one of the key streams of antimicrobial stewardship, and the use of point-of-care tests has been shown very effective in improving antibiotic use in both primary and secondary care settings, with the potential of reversing or flattening resistance trends related to lower antimicrobial use.
- To our knowledge, this is the first systematic review that formally analyses and compares the diagnostic accuracy of currently available point-of-care tests for UTI diagnosis.
- The results from this study will help identify the best available point-of-care test to diagnose UTIs in the primary care setting.
- It is likely significant heterogeneity will be found as all available tests will be explored. Random-effects meta-analysis will be performed to account for this.
- Studies involving paediatric population (<18 years old) or populations with certain conditions (detailed in exclusion criteria) will be excluded, as well as studies aimed at screening of asymptomatic bacteriuria, which may affect the generalisability of the results out with these situations.

## INTRODUCTION:

Urinary tract infections (UTIs) are the second most common cause of infection in primary [1] and secondary care [2] and most women experience at least one episode of acute uncomplicated cystitis in their lifetime. In the United Kingdom, UTIs account for 1-3% of all consultations in primary care each year [1]. UTIs are also responsible for a major part of antibiotic prescriptions, accounting for up to 15% of antimicrobial use in the community, with antibiotic use been described as one of the main factors contributing to the emergence of antimicrobial resistance (AMR) [3]. The rise of AMR has been postulated as one of the major challenges for health care worldwide [4]. It is related to increased morbidity, mortality and cost, particularly in vulnerable populations such as the elderly [4]. The World Health Organization Global Action Plan to Reduce Antimicrobial Resistance [5] includes improving antimicrobial use across all human and animal health, and environment settings through a One Health approach. Rates of AMR amongst gram-negative bacteria have progressively increased in the last decade in the European Union [6], with particularly concerning rise of carbapenemase-producing and extended-spectrum-beta-lactamase organisms [7].

Currently, most clinical guidelines recommend that primary care diagnosis and management of uncomplicated UTI should be done empirically [8][9], thus based on clinical symptoms. Although this approach has proven to be cost-effective [10], prescribing without diagnostic certainty increases the use of potentially unnecessary antibiotics, and contributes to the problem of antimicrobial resistance [11]. Up to 90% of patients presenting to primary care with urinary symptoms receive an antibiotic [7,12] but it is unclear how many will have a proven infection. Available evidence on how well symptoms predict the presence of a true UTI has shown diverging results, when compared to gold standard (urine culture). The probability of a female patient presenting to primary care with typical UTI symptoms and having a real infection is estimated to be between 50-80%, with the greatest predictability for haematuria, and if combined with a positive urine dipstick [13,14]. Therefore, alternative tests with enhanced diagnostic accuracy could potentially reduce inappropriate antimicrobial use in this context.

The gold standard for UTI diagnosis is urine culture from a midstream, clean urine catch. However, it is slow, requiring at least 24–48 hours to report the causative microorganism and provide an antibiotic resistance profile [15]. As previously mentioned, urine culture is not always performed, especially in primary care and emergency departments, where diagnosis of most UTIs occurs [16]. As result of this, different point-of-care tests (POC) have been developed aiming to provide a more rapid and accurate method for detecting infection. Point-of-care testing is defined as 'diagnostic testing, performed at or near the site where clinical care is delivered' [17]. POC test diagnostic accuracy is influenced dramatically from pre-test probability in different subpopulations [19] and consequently, its ability to detect or discard infection can be variable [20][21]. Potentially, an 'ideal' POC would allow for more timely

1  
2  
3 identification of UTIs, facilitating improved, targeted treatment, and reduced  
4 inappropriate antibiotic use. Indirect methods, such as urine dipsticks, which detect  
5 host inflammatory response rather than bacterial presence, have become the main  
6 POCT for UTIs [22]. Other techniques include culture-based devices, enzymatic  
7 assays and semi-automated urine analysers [23]. Previous reports suggest that their  
8 diagnostic accuracy could be greater than that of simpler urine dipsticks [16]. These  
9 tests could provide relevant information to clinicians to prescribe antimicrobials more  
10 accurately, reducing antibiotic-related harms (including resistance), and costs [24].  
11 However, it is difficult to ascertain which POC could be better for diagnosing UTIs in  
12 general and in specific situations.  
13  
14  
15  
16

17 Our aim is to systematically review and meta-analyse the diagnostic test  
18 accuracy of currently available point-of-care tests for urinary tract infections, as  
19 compared to gold standard (urine culture).  
20  
21  
22

## 23 METHODS AND ANALYSIS

### 24 Eligibility criteria

25  
26 Randomized clinical trials (RCTs), cluster RCTs, evaluation studies,  
27 observational studies and regulatory or approval evidence reports (if available),  
28 evaluating point-of-care diagnostic tests for UTI in symptomatic patients versus urine  
29 culture (gold standard) [7] will be included, from both primary or secondary care  
30 settings. No particular index test was pre-specified in our review search criteria, as we  
31 aimed to capture and compare all available tests. However, only those tests that could  
32 be categorised as 'point-of-care test' will be included, defined as the tests that can be  
33 carried out in close proximity to the patient, without involvement of laboratory facilities  
34 [25]. Inclusion criteria are detailed in **Box 1**, following the PIRD approach (Participants,  
35 Index test, Target condition, Reference standard) for including studies in systematic  
36 reviews of diagnostic test accuracy [26].  
37  
38  
39  
40  
41  
42  
43

#### 44 Box 1. Inclusion criteria

|                               |                                                                                |
|-------------------------------|--------------------------------------------------------------------------------|
| 47 <i>Participants:</i>       | Adults                                                                         |
| 48 <i>Presentation:</i>       | Symptomatic UTIs (dysuria, polyuria, urgency and/or<br>49 suprapubic pain)[13] |
| 50 <i>Index test(s):</i>      | Any point-of-care diagnostic test                                              |
| 51 <i>Target condition:</i>   | Urinary Tract Infections                                                       |
| 52 <i>Reference Standard:</i> | Urine culture                                                                  |



1  
2  
3  
4  
5  
6  
7  
8  
9  
10  
11  
12  
13  
14  
15  
16  
17  
18  
19  
20  
21  
22  
23  
24  
25  
26  
27  
28  
29  
30  
31  
32  
33  
34  
35  
36  
37  
38  
39  
40  
41  
42  
43  
44  
45  
46  
47  
48  
49  
50  
51  
52  
53  
54  
55  
56  
57  
58  
59  
60

Studies with the following characteristics will be excluded:

- Studies evaluating the detection of asymptomatic bacteriuria in pregnancy.
- Studies performed only in children.
- Tests aimed at detecting sexually transmitted infections, or non-bacterial infections (e.g. schistosomiasis).
- Tests based on biomarkers needing laboratory facilities.
- Studies whose main outcome measure is to detect complications of urinary infections (e.g. CT scans or other imaging techniques).
- Clinical algorithms or self-reported symptom tests.
- Specific populations will be excluded: urinary catheterized patients, kidney transplantation, terminal kidney failure or immunocompromised patients, patients with spinal cord injury or neurogenic bladder.

## Information sources & Search

MEDLINE, Web of Science, EMBASE and Cochrane Database of Systematic Reviews were searched from database inception to 8th October 2018 with no language restrictions. Only studies involving human health were included. The search included a combination of the following terms: "Urinary Tract Infections/diagnosis", "Diagnostic Tests, Routine", "Point-of-Care Systems", "Point-of-Care Testing", "point-of-care testing", 'near-patient testing,' 'RDT', "poc", "Diagnostic Technics and Procedures", "Techni\* and Procedures, Diagnostic", "rapid diagnostic test\*", AND "Urinary Tract Infections", "Pyuria", "Bacteriuria", "uti", AND "sensitivity", "specificity". The full search strategy is available in **Appendix 1** and online in PROSPERO's database [27].

## Study selection

Three reviewers (DFN, AAL and VHS) will independently assess study eligibility for inclusion. A calibration exercise assessing 10% of the results by title and abstract will be done in duplicate. After title and abstract screening, selected articles will be screened full-text. Discrepancies will be solved by discussion. Another reviewer will be involved as necessary (FS).

## Data collection process

A standardised data extraction form will be developed. The review team (DFN, AAL and VHS) will independently extract the data from all studies. Study authors will be contacted if no data is available.

## Diagnostic accuracy measures

A 2x2 contingency table with true positives, true negatives, false positives and false negatives will be extracted from each study. Accuracy outcome measures will include: sensitivity, specificity, positive and negative predictive values.

## Definitions for data extraction

From each study, besides the accuracy-related data already specified, we will extract the following predefined set of characteristics:

- Device/Product name.
- Manufacturer/ Country of origin.
- Regulatory approval status in the EU and US.
- Type of sample used (clean urine midstream catch, or other).
- Method principle (culture-based, enzymatic assay, other).
- Analysis time (time required, in minutes).
- Additional training required.
- Need for supplementary equipment (e.g. sterilizer, centrifuge...).
- Type of result provided if the test is positive (presence of infection, bacterial load, antibiotic sensitivity, indirect method for detection).
- The threshold for positivity detection, in Unit Forming Colonies (UFC).
- Population tested.
- Secondary outcomes: Mortality, Hospitalisation, Quality of life (QoL) measures and or patients' preferences, if reported.

## Risk of bias

Methodological quality assessment will be conducted using the QUADAS-2 tool (Quality Assessment of Diagnostic Accuracy studies) [28].

## Synthesis of results

A narrative description summarising the pre-specified characteristics of each test, and a paired sensitivity-specificity forest plot, will be provided. Meta-analysis will be performed depending on available data, sources of heterogeneity, comparability between methods and ability to aggregate data. If enough data is available, random-effects meta-analysis will be performed for each index test. The bivariate model will be used to ascertain summary sensitivity and specificity if all studies in the group use the same threshold value for positivity. If index tests use different threshold values, the hierarchical summary ROC model will be used instead, to obtain summary sensitivity and specificity for each threshold value. Sources of heterogeneity will be investigated, regarding index test used, threshold for detection, target population included in the study and its given (if reported) pre-test probability. Subgroup analysis will be explored and performed depending on the heterogeneity found.

## Patients and Public Involvement

Patients or the public were not involved in the design of our research. However, the findings from this review will be shared with key stakeholders, including patient groups, clinicians and guideline developers, and will also be presented at national and international conferences.

## ETHICS AND DISSEMINATION

Ethical approval was explored with the University of St Andrews School of Medicine Research and Ethics Committee but was not necessary due to the nature of the research (literature review). Results from this review will be shared with key stakeholders, including patient groups, clinicians and guideline developers, and will potentially inform future diagnostic and treatment pathways.

**Authors' contributions:**

VHS conceived the idea. The protocol was developed by DFN, FS, AAL and VHS. DFN performed the search strategy. VHS, DFN and AAL will contribute to design the data extraction form, screen manuscripts, extract data from individual studies and assess study quality. FS will act as a third reviewer in case of discrepancy. DFN redacted the original draft of the protocol. All authors reviewed and contributed to subsequent drafts and read and approved the final draft.

**Funding statement:**

DFN is supported by a NES general practice academic fellowship, AAL is supported by a HDR UK clinical postdoctoral fellowship, VHS is supported by an NRS clinical academic fellowship.

Other than the aforehead mentioned, this research received no other specific grant from any funding agency in the public, commercial or not-for-profit sectors

**Competing interests' statement:**

The authors declare no competing interests related to the production of this review.

## References

- 1 National Prescribing Centre. Urinary tract infection MeReC Bulletin Volume 17 Number 3. 2006. [http://www.spitalmures.ro/\\_files/protocoale\\_terapeutice/medicina de familie/acute\\_uti\\_final.pdf](http://www.spitalmures.ro/_files/protocoale_terapeutice/medicina_de_familie/acute_uti_final.pdf)
- 2 Lyytikäinen O, Kanerva M, Agthe N, *et al.* Healthcare-associated infections in Finnish acute care hospitals: a national prevalence survey, 2005. *ElsevierPaperpile* <https://www.sciencedirect.com/science/article/pii/S0195670108001199> (accessed 6 Dec 2018).
- 3 McClean P, Tunney M, Gilpin D, *et al.* Antimicrobial Prescribing in Nursing Homes in Northern Ireland. *Drugs Aging* 2011;**28**:819–29. doi:10.2165/11595050-000000000-00000
- 4 Levy SB, Marshall B. Antibacterial resistance worldwide: causes, challenges and responses. *Nat Med* 2004;**10**:S122–9. doi:10.1038/nm1145
- 5 WHO | Global action plan on antimicrobial resistance. WHO Published Online First: 2017. <http://www.who.int/antimicrobial-resistance/publications/global-action-plan/en/#.W-Gmsnm0nA.mendeley> (accessed 6 Nov 2018).
- 6 Ciorba V, Odone A, Veronesi L, *et al.* Antibiotic resistance as a major public health concern: epidemiology and economic impact. *Ann Ig* 2015;**27**:562–79. doi:10.7416/ai.2015.2048
- 7 Scotland. Healthcare Improvement Scotland., Scottish Intercollegiate Guidelines Network. *Management of suspected bacterial urinary tract infection in adults : a national clinical guideline*. Scottish Intercollegiate Guidelines Network (SIGN) 2012. <https://www.sign.ac.uk/sign-88-management-of-suspected-bacterial-urinary-tract-infection-in-adults.html> (accessed 2 Nov 2018).
- 8 Steadman S, Ahmed I, McGarry K, *et al.* Is screening for urine infection in well infants with prolonged jaundice required? Local review and meta-analysis of existing data. *Arch Dis Child* 2016;**101**:614–9. doi:10.1136/archdischild-2015-309265
- 9 National Institute for Health and Care Excellence. Urinary tract infection (lower): antimicrobial prescribing | Guidance | NICE. 2018. <https://www.nice.org.uk/guidance/ng109> (accessed 14 Jun 2019).
- 10 Fenwick EA, Briggs AH, Hawke CI. Management of urinary tract infection in general practice: a cost-effectiveness analysis. *Br J Gen Pract* 2000;**50**:635–9. <http://www.ncbi.nlm.nih.gov/pubmed/11042915> (accessed 14 Jun 2019).
- 11 Hernandez-Santiago V, Davey PG, Nathwani D, *et al.* Changes in resistance among coliform bacteraemia associated with a primary care antimicrobial stewardship intervention: A population-based interrupted time series study. *PLOS Med* 2019;**16**:e1002825. doi:10.1371/journal.pmed.1002825
- 12 Fahey T, Webb E, Montgomery AA, *et al.* Clinical management of urinary tract infection in women: a prospective cohort study. *Fam Pract* 2003;**20**:1–6.
- 13 Bent S, Nallamothu BK, Simel DL, *et al.* Does this woman have an acute uncomplicated urinary tract infection? *JAMA* 2002;**287**:2701–10.
- 14 Giesen LGM, Cousins G, Dimitrov BD, *et al.* Predicting acute uncomplicated urinary tract infection in women: a systematic review of the diagnostic accuracy of symptoms and signs. *BMC Fam Pract* 2010;**11**:78. doi:10.1186/1471-2296-11-78
- 15 Schmiemann G, Kniehl E, Gebhardt K, *et al.* The diagnosis of urinary tract infection: a systematic review. *Dtsch Arztebl Int* 2010;**107**:361–7. doi:10.3238/arztebl.2010.0361
- 16 Baker C. Accident and emergency statistics: demand, performance and pressure. *House Commons Libr* 2017;**6964**:1–32.
- 17 Nichols JH. Point of Care Testing. *Clin Lab Med* 2007;**27**:893–908. doi:10.1016/J.CLL.2007.07.003
- 18 St John A, Price CP. Existing and Emerging Technologies for Point-of-Care Testing. *Clin Biochem Rev* 2014;**35**:155–67. <http://www.ncbi.nlm.nih.gov/pubmed/25336761>

- (accessed 14 Jun 2019).
- 19 A.G M, M.D.S D, T.L F, *et al.* Using urine dipstick as a presumptive result for urinary tract infection. *Clin Chem* 2015;**61**:S196–S196.<http://www.embase.com/search/results?subaction=viewrecord&from=export&id=L72265463>
- 20 Hurlbut TA, Littenberg B. The diagnostic accuracy of rapid dipstick tests to predict urinary tract infection. *Am J Clin Pathol* 1991;**96**:582–8.<http://www.ncbi.nlm.nih.gov/pubmed/1951183> (accessed 5 Nov 2018).
- 21 GLASS | Global antimicrobial resistance surveillance system (GLASS) report. *WHO* Published Online First: 2018.<http://www.who.int/glass/resources/publications/early-implementation-report/en/#.W-K8qcwb57U.mendeley> (accessed 7 Nov 2018).
- 22 Little P, Moore M V, Turner S, *et al.* Effectiveness of five different approaches in management of urinary tract infection: randomised controlled trial. *BMJ* 2010;**340**:c199.
- 23 NIHR Diagnostic Evidence Co-operative Oxford. Point-of-care testing for urinary tract infections. Horizon Scan Report. Oxford, UK: 2016.
- 24 Roberts RR, Hota B, Ahmad I, *et al.* Hospital and Societal Costs of Antimicrobial-Resistant Infections in a Chicago Teaching Hospital: Implications for Antibiotic Stewardship. *Clin Infect Dis* 2009;**49**:1175–84. doi:10.1086/605630
- 25 Gerald JK. Goals, guidelines and principles for point-of-care testing. *Princ Pract Point-of-Care Test* 2001;:1–12.
- 26 Leeflang MMG, Deeks JJ, Gatsonis C, *et al.* Systematic reviews of diagnostic test accuracy. *Ann Intern Med* 2008;**149**:889–97.<http://www.ncbi.nlm.nih.gov/pubmed/19075208> (accessed 6 Dec 2018).
- 27 Fraile Navarro D, Sullivan F, Hernandez-Santiago V. Search Strategy for “Point-of-care tests for urinary tract infections: diagnostic test accuracy systematic review and meta-analysis”; PROSPERO. 2018.[https://www.crd.york.ac.uk/PROSPEROFILES/112019\\_STRATEGY\\_20181113.pdf](https://www.crd.york.ac.uk/PROSPEROFILES/112019_STRATEGY_20181113.pdf) (accessed 17 Dec 2018).
- 28 Whiting PF, Rutjes AWS, Westwood ME, *et al.* QUADAS-2: A Revised Tool for the Quality Assessment of Diagnostic Accuracy Studies. *Ann Intern Med* 2011;**155**:529. doi:10.7326/0003-4819-155-8-201110180-00009

## APPENDIX 1 – SEARCH STRATEGY

### PUBMED

((("Urinary Tract Infections/diagnosis"[Mesh]) OR ("Diagnostic Tests, Routine"[Mesh]) OR ("Point-of-Care Systems"[Mesh]) OR ("Point-of-Care Testing"[Mesh]) OR ("point-of-care testing"[tw]) OR ('near-patient testing'[tw]) OR ('RDT'[tiab]) OR ("poc"[tw]) OR ("Diagnostic Technics and Procedures"[Mesh]) OR ("Techni\* and Procedures, Diagnostic"[Mesh]) OR ("rapid diagnostic test\*"[tiab])) AND (("Urinary Tract Infections"[Mesh]) OR ("Pyuria"[Mesh]) OR ("Bacteriuria"[Mesh]) OR ("uti"[tiab])) AND (("sensitivity"[tiab]) OR ("specificity"[tiab]))

### EMBASE

('urinary tract infection\$/exp OR 'uti'/exp OR 'pyuria'/exp OR 'bacteriuria'/exp) AND ('urinary tract infections diagnosis'/exp OR 'rapid diagnostic test'/exp OR 'point of care test'/exp OR 'poc'/exp OR 'near patient'/exp)

### Web of Science

TS=(urinary tract infection\* OR pyuria OR bacteriuria OR uti) AND TS=(point of care OR point-of-care OR near-patient OR diagnostic test\* OR poc) AND TS=(sensitivity OR specificity)

### Cochrane Database of Systematic Reviews

“Urinary tract infections” AND “diagnosis”

# BMJ Open

## Point-of-care tests for urinary tract infections: Protocol for a systematic review and meta-analysis of diagnostic test accuracy

|                                 |                                                                                                                                                                                                                                                                                                                                                                                                                           |
|---------------------------------|---------------------------------------------------------------------------------------------------------------------------------------------------------------------------------------------------------------------------------------------------------------------------------------------------------------------------------------------------------------------------------------------------------------------------|
| Journal:                        | <i>BMJ Open</i>                                                                                                                                                                                                                                                                                                                                                                                                           |
| Manuscript ID                   | bmjopen-2019-033424.R1                                                                                                                                                                                                                                                                                                                                                                                                    |
| Article Type:                   | Protocol                                                                                                                                                                                                                                                                                                                                                                                                                  |
| Date Submitted by the Author:   | 09-Dec-2019                                                                                                                                                                                                                                                                                                                                                                                                               |
| Complete List of Authors:       | Frailé Navarro, David; University of Saint Andrews School of Medicine<br>Sullivan, Frank; University of St. Andrews, ; North York General hospital,<br><br>Azcoaga-Lorenzo, Amaya; University of Saint Andrews School of<br>Medicine, Division of Population and Behavioural Sciences<br>Hernandez Santiago, Virginia; University of Saint Andrews School of<br>Medicine, Division of Population and Behavioural Sciences |
| <b>Primary Subject Heading</b>: | General practice / Family practice                                                                                                                                                                                                                                                                                                                                                                                        |
| Secondary Subject Heading:      | Infectious diseases, Health services research, Diagnostics                                                                                                                                                                                                                                                                                                                                                                |
| Keywords:                       | Diagnostic microbiology < INFECTIOUS DISEASES, Epidemiology < INFECTIOUS DISEASES, Molecular diagnostics < INFECTIOUS DISEASES, Urinary tract infections < UROLOGY                                                                                                                                                                                                                                                        |
|                                 |                                                                                                                                                                                                                                                                                                                                                                                                                           |

SCHOLARONE™  
Manuscripts



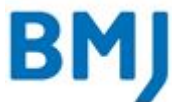

I, the Submitting Author has the right to grant and does grant on behalf of all authors of the Work (as defined in the below author licence), an exclusive licence and/or a non-exclusive licence for contributions from authors who are: i) UK Crown employees; ii) where BMJ has agreed a CC-BY licence shall apply, and/or iii) in accordance with the terms applicable for US Federal Government officers or employees acting as part of their official duties; on a worldwide, perpetual, irrevocable, royalty-free basis to BMJ Publishing Group Ltd ("BMJ") its licensees and where the relevant Journal is co-owned by BMJ to the co-owners of the Journal, to publish the Work in this journal and any other BMJ products and to exploit all rights, as set out in our [licence](#).

The Submitting Author accepts and understands that any supply made under these terms is made by BMJ to the Submitting Author unless you are acting as an employee on behalf of your employer or a postgraduate student of an affiliated institution which is paying any applicable article publishing charge ("APC") for Open Access articles. Where the Submitting Author wishes to make the Work available on an Open Access basis (and intends to pay the relevant APC), the terms of reuse of such Open Access shall be governed by a Creative Commons licence – details of these licences and which [Creative Commons](#) licence will apply to this Work are set out in our licence referred to above.

Other than as permitted in any relevant BMJ Author's Self Archiving Policies, I confirm this Work has not been accepted for publication elsewhere, is not being considered for publication elsewhere and does not duplicate material already published. I confirm all authors consent to publication of this Work and authorise the granting of this licence.

1  
2  
3  
4 **Title:** *Point-of-care* tests for urinary  
5 tract infections: Protocol for a  
6 systematic review and meta-analysis of  
7 diagnostic test accuracy.  
8  
9  
10  
11  
12  
13  
14

15 **Authors:** Fraile Navarro D, Sullivan F, Azcoaga-Lorenzo A, Hernandez-Santiago V

16 **Affiliation:** University of St Andrews  
17  
18

19 Dr David Fraile Navarro, MSc, MBChB  
20 NHS Education Scotland Academic Fellow in General Practice  
21 University of St Andrews, St Andrews  
22 United Kingdom  
23  
24

25 Dr Frank Sullivan, FRCGP PhD  
26 Professor of Primary Care Head of Division Population & Behavioural Science  
27 Medical School Director of Research  
28 University of St Andrews, St Andrews  
29 United Kingdom  
30  
31  
32

33 Dr Amaya Azcoaga Lorenzo, PhD, MBChB  
34 HDR UK Clinical Postdoctoral Fellow  
35 University of St Andrews, St Andrews  
36 United Kingdom  
37  
38  
39

40 Dr Virginia Hernandez-Santiago\*, PhD, MBChB  
41 NRS Clinical Postdoctoral Fellow,  
42 University of St Andrews, St Andrews  
43 United Kingdom  
44  
45  
46  
47  
48  
49

50 \*Corresponding author: Dr Virginia Hernandez-Santiago, [vhs2@st-andrews.ac.uk](mailto:vhs2@st-andrews.ac.uk)  
51  
52  
53  
54  
55  
56  
57  
58  
59  
60

## ABSTRACT: *(BMJ Open Protocol format)*

### Introduction

Urinary tract infections (UTIs) are the second most common type of infection worldwide, accounting for a large number of primary care consultations and antibiotic prescribing. Current diagnosis is based on an empirical approach, relying on symptoms and occasional use of urine dipsticks. The diagnostic reference standard is still urine culture, although it is not routinely recommended for uncomplicated UTIs in the community, due to time to diagnosis (48h). Faster Point-of-care tests have been developed, but their diagnostic accuracy has not been compared. Our objective is to systematically review and meta-analyse the diagnostic accuracy of currently available point-of-care tests for urinary tract infections.

### Methods and analysis

Studies evaluating the diagnostic accuracy of point-of-care tests for urinary tract infections will be included. Pubmed, Web of Science, EMBASE and Cochrane Database of Systematic Reviews were searched from inception to the 1<sup>st</sup> June 2019. Data extraction and risk of bias assessment will be assessed using the Quality Assessment of Diagnostic Accuracy Studies (QUADAS-2) tool. Meta-analysis will be performed depending on data availability and heterogeneity.

### Ethics and dissemination

This is a systematic review protocol and therefore formal ethical approval is not required, as no primary, identifiable, personal data will be collected. Patients or the public were not involved in the design of our research. However, the findings from this review will be shared with key stakeholders, including patient groups, clinicians and guideline developers, and will also be presented at national and international conferences.

### Registration

The protocol is registered in PROSPERO, registration number: CRD42018112019

### Keywords

Systematic Review, Urinary Tract Infections, Infectious Diseases, Diagnostic Accuracy, Point-of-care tests.

## Strengths and limitations of this study *(first point deleted)*

- To our knowledge, this is the first systematic review that formally analyses and compares the diagnostic accuracy of currently available point-of-care tests for UTI diagnosis.
- The results from this study will help identify the best available point-of-care test to diagnose UTIs in the primary care setting.
- It is likely significant heterogeneity will be found as all available tests will be explored, and meta-analysis will be performed to account for this.
- Studies involving paediatric population (<18 years old) or populations with certain conditions (detailed in exclusion criteria) will be excluded, as well as studies aimed at screening of asymptomatic bacteriuria, which may affect the generalisability of the results out with these situations.

## INTRODUCTION:

Urinary tract infections (UTIs) are the second most common cause of infection in primary [1] and secondary care [2] and most women experience at least one episode of acute uncomplicated cystitis in their lifetime. In the United Kingdom, UTIs account for 1-3% of all consultations in primary care each year [1]. UTIs are also responsible for a major part of antibiotic prescriptions, accounting for up to 15% of antimicrobial use in the community, with antibiotic use been described as one of the main factors contributing to the emergence of antimicrobial resistance (AMR) [3]. The rise of AMR has been postulated as one of the major challenges for health care worldwide [4]. It is related to increased morbidity, mortality and cost, particularly in vulnerable populations such as the elderly [4]. The World Health Organization Global Action Plan to Reduce Antimicrobial Resistance [5] includes improving antimicrobial use across all human and animal health, and environment settings through a One Health approach. Rates of AMR amongst gram-negative bacteria have progressively increased in the last decade in the European Union [6], with particularly concerning rise of carbapenemase-producing and extended-spectrum-beta-lactamase organisms [7].

Currently, most clinical guidelines recommend that primary care diagnosis and management of uncomplicated UTI should be done empirically [8][9], thus based on clinical symptoms. Although this approach has proven to be cost-effective [10], prescribing without diagnostic certainty increases the use of potentially unnecessary antibiotics, and contributes to the problem of antimicrobial resistance [11]. Up to 90% of patients presenting to primary care with urinary symptoms receive an antibiotic [7,12] but it is usually without further investigation, so it is unclear how many will have a proven infection. Available evidence on how well symptoms predict the presence of a true UTI has shown diverging results, when compared to gold standard (urine culture). The probability of a female patient presenting to primary care with typical UTI symptoms and having a confirmed infection is estimated to be between 50-80%, with the greatest predictability for haematuria, and if combined with a positive urine dipstick [13,14]. Therefore, alternative tests with enhanced diagnostic accuracy could potentially reduce inappropriate antimicrobial use in this context.

The gold standard for UTI diagnosis is urine culture from a midstream, clean urine catch, but as previously mentioned, urine culture is not always performed, especially in primary care and emergency departments, where diagnosis of most UTIs occurs [15]. Urine culture is slow, requiring at least 24-48 hours to report the causative microorganism and provide an antibiotic resistance profile [16], and symptoms are usually distressing enough to prompt on the day empirical management, as since acutely unwell patients with UTI symptoms may not be prepared to wait up to 48 hours for a culture result. Current clinical guidelines also advocate empirical treatment if symptoms are sufficiently suggestive of a diagnosis of UTI [9]. Empirical decision-making will often result in the patient getting an antibiotic without infection confirmation. As result of this, different point-of-care tests (POCT) have been

1  
2  
3 developed aiming to provide a more rapid and accurate method for detecting infection.  
4 Point-of-care testing has been defined as ‘a test to support clinical decision making,  
5 performed nearby the patient and on any part of the patient’s body or its derivatives, to  
6 help the patient and healthcare professional upon the best management approach  
7 during or very close to the time of the consultation, with results available at the time of  
8 clinical decision making’ [17]. POCT diagnostic accuracy is influenced dramatically  
9 from pre-test probability in different subpopulations [18] and consequently, its ability  
10 to detect or discard infection can be variable [19][20]. Potentially, an ‘ideal’ POCT  
11 would allow for more timely identification of UTIs, facilitating improved, targeted  
12 treatment, and reduced inappropriate antibiotic use. Indirect methods, such as urine  
13 dipsticks, which detect host inflammatory response rather than bacterial presence,  
14 have become the main POCT for UTIs [21]. Other techniques include culture-based  
15 devices, enzymatic assays and semi-automated urine analysers [22]. Previous reports  
16 suggest that their diagnostic accuracy could be greater than that of simpler urine  
17 dipsticks [16]. These tests could provide relevant information to clinicians to prescribe  
18 antimicrobials more accurately, reducing antibiotic-related harms (including  
19 resistance), and costs [23]. However, it is difficult to ascertain which POCT could be  
20 better for diagnosing UTIs in general and in specific situations.  
21  
22

23  
24  
25  
26  
27  
28 Our aim is to systematically review and meta-analyse the diagnostic test  
29 accuracy of currently available point-of-care tests for urinary tract infections, as  
30 compared to gold standard (urine culture).  
31  
32

## 33 **METHODS AND ANALYSIS**

### 34 **Eligibility criteria**

35  
36  
37  
38  
39 Randomized clinical trials (RCTs), cluster RCTs, evaluation studies,  
40 observational studies and regulatory or approval evidence reports (if available),  
41 evaluating point-of-care diagnostic tests for UTI in symptomatic patients versus urine  
42 culture (reference standard) [7] will be included, from both primary or secondary care  
43 settings. No particular index test was pre-specified in our review search criteria, as we  
44 aimed to capture and compare all available tests. However, only those tests that could  
45 be categorised as ‘point-of-care test’ will be included, defined as above [17]. Inclusion  
46 criteria are detailed in **Box 1**, following the PIRD approach (Participants, Index test,  
47 Target condition, Reference standard) for including studies in systematic reviews of  
48 diagnostic test accuracy [24].  
49  
50  
51  
52  
53  
54  
55  
56  
57  
58  
59  
60

### Box 1. Inclusion criteria

|                            |                                                                          |
|----------------------------|--------------------------------------------------------------------------|
| <i>Participants:</i>       | Adults                                                                   |
| <i>Presentation:</i>       | Symptomatic UTIs (dysuria, polyuria, urgency and/or suprapubic pain)[13] |
| <i>Index test(s):</i>      | Any point-of-care diagnostic test                                        |
| <i>Target condition:</i>   | Urinary Tract Infections                                                 |
| <i>Reference Standard:</i> | Urine culture                                                            |

The search strategy uses broad terms for defining UTI with the aim of capturing all potentially relevant studies looking at POCT used in symptomatic UTIs. Classical symptoms include those mentioned in Box 1 above, and we will also examine different symptoms / combinations and UTI definition used in each study. Exclusion criteria will be applied and are detailed below. These include:

- Studies evaluating the detection of asymptomatic bacteriuria in pregnancy.
- Studies performed only in children.
- Tests aimed at detecting sexually transmitted infections, or non-bacterial infections (e.g. schistosomiasis).
- Tests based on biomarkers needing laboratory facilities.
- Studies whose main outcome measure is to detect complications of urinary infections (e.g. CT scans or other imaging techniques).
- Clinical algorithms or self-reported symptom tests.
- Specific populations will be excluded: urinary catheterized patients, kidney transplantation, terminal kidney failure or immunocompromised patients, patients with spinal cord injury or neurogenic bladder.

### Information sources & Search

MEDLINE, Web of Science, EMBASE and Cochrane Database of Systematic Reviews were searched from database inception to 1<sup>st</sup> June 2019 with no language restrictions. Only studies involving human health were included. The search included a combination of the following terms: "Urinary Tract Infections/diagnosis", "Diagnostic Tests, Routine", "Point-of-Care Systems", "Point-of-Care Testing", "point-of-care testing", "near-patient testing," "RDT", "poc", "Diagnostic Technics and Procedures", "Techni\* and Procedures, Diagnostic", "rapid diagnostic test\*", AND "Urinary Tract Infections", "Pyuria", "Bacteriuria", "uti", AND "sensitivity", "specificity". The full search strategy is available in **Appendix 1** and online in PROSPERO's database [25].



## Data management

Search results will be stored in EndNote version X8.2 bibliography management software. To synthesize and develop study selection, data extraction and quality assessment we will use Covidence platform [26].

## Study selection

Three reviewers (DFN, AAL and VHS) will independently assess study eligibility for inclusion. A calibration exercise assessing 10% of the results by title and abstract will be done in duplicate. After title and abstract screening, selected articles will be screened full-text. Discrepancies will be solved by discussion. Another reviewer will be involved as necessary (FS).

## Data collection process

A standardised data extraction form will be developed. The review team (DFN, AAL and VHS) will independently extract the data from all studies. Study authors will be contacted if no data is available. All articles will be double-extracted, and risk of bias will be double-assessed. Discrepancies will be evaluated and solved by discussion, and if no agreement, a third reviewer will be involved.

## Diagnostic accuracy measures

A 2x2 contingency table with true positives, true negatives, false positives and false negatives will be extracted from each study. Accuracy outcome measures will include: sensitivity, specificity, positive and negative predictive values.

## Definitions for data extraction

From each study, besides the accuracy-related data already specified, we will extract the following predefined set of characteristics:

- Device/Product name.
- Manufacturer/ Country of origin.
- Regulatory approval status in the EU and US.
- Type of sample used (clean urine midstream catch, or other).
- Method principle (culture-based, enzymatic assay, other).
- Analysis time (time required, in minutes).
- Additional training required.
- Need for supplementary equipment (e.g. sterilizer, centrifuge...).
- Cost.
- Type of result provided if the test is positive (presence of infection, bacterial load, antibiotic sensitivity, indirect method for detection).
- The threshold for positivity detection, in Unit Forming Colonies (UFC).



- Population tested.
- UTI definition used.
- Secondary outcomes: Mortality, Hospitalisation, Quality of life (QoL) measures and or patients' preferences, if reported.

## Risk of bias

Methodological quality assessment will be conducted using the QUADAS-2 tool (Quality Assessment of Diagnostic Accuracy studies) [27].

## Synthesis of results

A narrative description summarising the pre-specified characteristics of each test, and a paired sensitivity-specificity forest plot, will be provided. Meta-analysis will be performed depending on available data, sources of heterogeneity, comparability between methods and ability to aggregate data. If enough data is available, random-effects meta-analysis will be performed for each index test. The bivariate model will be used to ascertain summary sensitivity and specificity if all studies in the group use the same threshold value for positivity. If index tests use different threshold values, the hierarchical summary ROC model will be used instead, to obtain summary sensitivity and specificity for each threshold value. Sources of heterogeneity will be investigated, regarding index test used, threshold for detection, target population included in the study and its given (if reported) pre-test probability. Subgroup analysis will be explored and performed depending on the heterogeneity found and available data, analysing separately studies looking at each POCT, and also different population groups (differentiating adults from elderly patients).

## Patients and Public Involvement

Patients or the public were not involved in the design of our research. However, the findings from this review will be shared with key stakeholders, including patient groups, clinicians and guideline developers, and will also be presented at national and international conferences.

## ETHICS AND DISSEMINATION

Ethical approval was explored with the University of St Andrews School of Medicine Research and Ethics Committee but was not necessary due to the nature of the research (literature review). Results from this review will be shared with key stakeholders, including patient groups, clinicians and guideline developers, and will potentially inform future diagnostic and treatment pathways.

**Authors' contributions:**

VHS conceived the idea. The protocol was developed by DFN, FS, AAL and VHS. DFN performed the search strategy. VHS, DFN and AAL will contribute to design the data extraction form, screen manuscripts, extract data from individual studies and assess study quality. FS will act as a third reviewer in case of discrepancy. DFN redacted the original draft of the protocol. All authors reviewed and contributed to subsequent drafts and read and approved the final draft.

**Funding statement:**

DFN is supported by a NES general practice academic fellowship, AAL is supported by an HDR UK clinical postdoctoral fellowship, VHS is supported by an NRS clinical academic fellowship.

Other than the aforementioned, this research received no other specific grant from any funding agency in the public, commercial or not-for-profit sectors.

**Competing interests' statement:**

The authors declare no competing interests related to the production of this review.

## References

- 1 National Prescribing Centre. Urinary tract infection MeReC Bulletin Volume 17 Number 3. 2006. [http://www.spitalmures.ro/\\_files/protocoale\\_terapeutice/medicina de familie/acute\\_uti\\_final.pdf](http://www.spitalmures.ro/_files/protocoale_terapeutice/medicina_de_familie/acute_uti_final.pdf)
- 2 Lyytikäinen O, Kanerva M, Agthe N, *et al.* Healthcare-associated infections in Finnish acute care hospitals: a national prevalence survey, 2005. *ElsevierPaperpile* <https://www.sciencedirect.com/science/article/pii/S0195670108001199> (accessed 6 Dec 2018).
- 3 McClean P, Tunney M, Gilpin D, *et al.* Antimicrobial Prescribing in Nursing Homes in Northern Ireland. *Drugs Aging* 2011;**28**:819–29. doi:10.2165/11595050-000000000-00000
- 4 Levy SB, Marshall B. Antibacterial resistance worldwide: causes, challenges and responses. *Nat Med* 2004;**10**:S122–9. doi:10.1038/nm1145
- 5 WHO | Global action plan on antimicrobial resistance. WHO Published Online First: 2017. <http://www.who.int/antimicrobial-resistance/publications/global-action-plan/en/#.W-Gmsnm0nA.mendeley> (accessed 6 Nov 2018).
- 6 Ciorba V, Odone A, Veronesi L, *et al.* Antibiotic resistance as a major public health concern: epidemiology and economic impact. *Ann Ig* 2015;**27**:562–79. doi:10.7416/ai.2015.2048
- 7 Scotland. Healthcare Improvement Scotland., Scottish Intercollegiate Guidelines Network. *Management of suspected bacterial urinary tract infection in adults : a national clinical guideline*. Scottish Intercollegiate Guidelines Network (SIGN) 2012. <https://www.sign.ac.uk/sign-88-management-of-suspected-bacterial-urinary-tract-infection-in-adults.html> (accessed 2 Nov 2018).
- 8 Steadman S, Ahmed I, McGarry K, *et al.* Is screening for urine infection in well infants with prolonged jaundice required? Local review and meta-analysis of existing data. *Arch Dis Child* 2016;**101**:614–9. doi:10.1136/archdischild-2015-309265
- 9 National Institute for Healthcare Excellence (NICE). Urinary tract infection (lower): antimicrobial prescribing Guidance. <https://www.nice.org.uk/guidance/ng109#.XdZwkGqjTpQ.mendeley> (accessed 21 Nov 2019).
- 10 Fenwick EA, Briggs AH, Hawke CI. Management of urinary tract infection in general practice: a cost-effectiveness analysis. *Br J Gen Pract* 2000;**50**:635–9. <http://www.ncbi.nlm.nih.gov/pubmed/11042915> (accessed 14 Jun 2019).
- 11 Hernandez-Santiago V, Davey PG, Nathwani D, *et al.* Changes in resistance among coliform bacteraemia associated with a primary care antimicrobial stewardship intervention: A population-based interrupted time series study. *PLOS Med* 2019;**16**:e1002825. doi:10.1371/journal.pmed.1002825
- 12 Fahey T, Webb E, Montgomery AA, *et al.* Clinical management of urinary tract infection in women: a prospective cohort study. *Fam Pract* 2003;**20**:1–6.
- 13 Bent S, Nallamotheu BK, Simel DL, *et al.* Does this woman have an acute uncomplicated urinary tract infection? *JAMA* 2002;**287**:2701–10.
- 14 Giesen LGM, Cousins G, Dimitrov BD, *et al.* Predicting acute uncomplicated urinary tract infection in women: a systematic review of the diagnostic accuracy of symptoms and signs. *BMC Fam Pract* 2010;**11**:78. doi:10.1186/1471-2296-11-78
- 15 Schmiemann G, Kniehl E, Gebhardt K, *et al.* The diagnosis of urinary tract infection: a systematic review. *Dtsch Arztebl Int* 2010;**107**:361–7. doi:10.3238/arztebl.2010.0361
- 16 Baker C. Accident and emergency statistics: demand, performance and pressure. *House Commons Libr* 2017;**6964**:1–32.
- 17 Schols AMR, Dinant G-J, Hopstaken R, *et al.* International definition of a point-of-care test in family practice: a modified e-Delphi procedure. *Fam Pract* 2018;**35**:475–80. doi:10.1093/fampra/cmz134

- 1  
2  
3 18 A.G M, M.D.S D, T.L F, *et al.* Using urine dipstick as a presumptive result for urinary  
4 tract infection. *Clin Chem* 2015;**61**:S196–  
5 S196.<http://www.embase.com/search/results?subaction=viewrecord&from=export&id=L72265463>  
6 L72265463  
7 19 Hurlbut TA, Littenberg B. The diagnostic accuracy of rapid dipstick tests to predict  
8 urinary tract infection. *Am J Clin Pathol* 1991;**96**:582–  
9 8.<http://www.ncbi.nlm.nih.gov/pubmed/1951183> (accessed 5 Nov 2018).  
10 20 GLASS | Global antimicrobial resistance surveillance system (GLASS) report. *WHO*  
11 Published Online First: 2018.[http://www.who.int/glass/resources/publications/early-](http://www.who.int/glass/resources/publications/early-implementation-report/en/#.W-K8qcwb57U.mendeley)  
12 [implementation-report/en/#.W-K8qcwb57U.mendeley](http://www.who.int/glass/resources/publications/early-implementation-report/en/#.W-K8qcwb57U.mendeley) (accessed 7 Nov 2018).  
13 21 Little P, Moore M V, Turner S, *et al.* Effectiveness of five different approaches in  
14 management of urinary tract infection: randomised controlled trial. *BMJ*  
15 2010;**340**:c199.  
16 22 NIHR Diagnostic Evidence Co-operative Oxford. Point-of-care testing for urinary tract  
17 infections. Horizon Scan Report. Oxford, UK: 2016.  
18 23 Roberts RR, Hota B, Ahmad I, *et al.* Hospital and Societal Costs of  
19 Antimicrobial-Resistant Infections in a Chicago Teaching Hospital: Implications for  
20 Antibiotic Stewardship. *Clin Infect Dis* 2009;**49**:1175–84. doi:10.1086/605630  
21 24 Leeflang MMG, Deeks JJ, Gatsonis C, *et al.* Systematic reviews of diagnostic test  
22 accuracy. *Ann Intern Med* 2008;**149**:889–  
23 97.<http://www.ncbi.nlm.nih.gov/pubmed/19075208> (accessed 6 Dec 2018).  
24 25 Fraile Navarro D, Sullivan F, Hernandez-Santiago V. Search Strategy for "Point-  
25 of-care tests for urinary tract infections: diagnostic test accuracy systematic review  
26 and meta-analysis" PROSPERO.  
27 2018.[https://www.crd.york.ac.uk/PROSPEROFILES/112019\\_STRATEGY\\_20181113.](https://www.crd.york.ac.uk/PROSPEROFILES/112019_STRATEGY_20181113.pdf)  
28 [pdf](https://www.crd.york.ac.uk/PROSPEROFILES/112019_STRATEGY_20181113.pdf) (accessed 17 Dec 2018).  
29 26 Veritas Health Innovation. Covidence systematic review software. [www.covidence.org](http://www.covidence.org)  
30 27 Whiting PF, Rutjes AWS, Westwood ME, *et al.* QUADAS-2: A Revised Tool for the  
31 Quality Assessment of Diagnostic Accuracy Studies. *Ann Intern Med* 2011;**155**:529.  
32 doi:10.7326/0003-4819-155-8-201110180-00009  
33  
34  
35  
36  
37  
38  
39  
40  
41  
42  
43  
44  
45  
46  
47  
48  
49  
50  
51  
52  
53  
54  
55  
56  
57  
58  
59  
60

## APPENDIX 1 – SEARCH STRATEGY

### PUBMED

((("Urinary Tract Infections/diagnosis"[Mesh]) OR ("Diagnostic Tests, Routine"[Mesh]) OR ("Point-of-Care Systems"[Mesh]) OR ("Point-of-Care Testing"[Mesh]) OR ("point-of-care testing"[tw]) OR ('near-patient testing'[tw]) OR ('RDT'[tiab]) OR ("poc[tw]) OR ("Diagnostic Technics and Procedures"[Mesh]) OR ("Techni\* and Procedures, Diagnostic"[Mesh]) OR ("rapid diagnostic test\*"[tiab])) AND (("Urinary Tract Infections"[Mesh]) OR ("Pyuria"[Mesh]) OR ("Bacteriuria"[Mesh]) OR ("uti"[tiab])) AND (("sensitivity"[tiab]) OR ("specificity"[tiab]))

### EMBASE

('urinary tract infection\$/exp OR 'uti'/exp OR 'pyuria'/exp OR 'bacteriuria'/exp) AND ('urinary tract infections diagnosis'/exp OR 'rapid diagnostic test'/exp OR 'point of care test'/exp OR 'poc[tw] OR 'near patient'/exp)

### Web of Science

TS=(urinary tract infection\* OR pyuria OR bacteriuria OR uti) AND TS=(point of care OR point-of-care OR near-patient OR diagnostic test\* OR poc[tw]) AND TS=(sensitivity OR specificity)

### Cochrane Database of Systematic Reviews

“Urinary tract infections” AND “diagnosis”

## Appendix 2: PRISMA-P 2015 Checklist

This checklist has been adapted from Moher D et al: Preferred reporting items for systematic review and meta-analysis protocols (PRISMA-P) 2015 statement. *Systematic Reviews* 2015 4:1

| Section/topic                     | #  | Checklist item                                                                                                                                                                                  | Information reported                |                                     | Line number(s) |
|-----------------------------------|----|-------------------------------------------------------------------------------------------------------------------------------------------------------------------------------------------------|-------------------------------------|-------------------------------------|----------------|
|                                   |    |                                                                                                                                                                                                 | Yes                                 | No                                  |                |
| <b>ADMINISTRATIVE INFORMATION</b> |    |                                                                                                                                                                                                 |                                     |                                     |                |
| <b>Title</b>                      |    |                                                                                                                                                                                                 |                                     |                                     |                |
| Identification                    | 1a | Identify the report as a protocol of a systematic review                                                                                                                                        | <input checked="" type="checkbox"/> | <input type="checkbox"/>            | 2              |
| Update                            | 1b | If the protocol is for an update of a previous systematic review, identify as such                                                                                                              | <input type="checkbox"/>            | <input checked="" type="checkbox"/> | NA             |
| <b>Registration</b>               | 2  | If registered, provide the name of the registry (e.g., PROSPERO) and registration number in the Abstract                                                                                        | <input checked="" type="checkbox"/> | <input type="checkbox"/>            | 63             |
| <b>Authors</b>                    |    |                                                                                                                                                                                                 |                                     |                                     |                |
| Contact                           | 3a | Provide name, institutional affiliation, and e-mail address of all protocol authors; provide physical mailing address of corresponding author                                                   | <input type="checkbox"/>            | <input type="checkbox"/>            | 8-32           |
| Contributions                     | 3b | Describe contributions of protocol authors and identify the guarantor of the review                                                                                                             | <input checked="" type="checkbox"/> | <input type="checkbox"/>            | 267-273        |
| <b>Amendments</b>                 | 4  | If the protocol represents an amendment of a previously completed or published protocol, identify as such and list changes; otherwise, state plan for documenting important protocol amendments | <input type="checkbox"/>            | <input checked="" type="checkbox"/> | NA             |
| <b>Support</b>                    |    |                                                                                                                                                                                                 |                                     |                                     |                |
| Sources                           | 5a | Indicate sources of financial or other support for the review                                                                                                                                   | <input checked="" type="checkbox"/> | <input type="checkbox"/>            | 274-279        |
| Sponsor                           | 5b | Provide name for the review funder and/or sponsor                                                                                                                                               | <input type="checkbox"/>            | <input checked="" type="checkbox"/> | NA             |
| Role of sponsor/funder            | 5c | Describe roles of funder(s), sponsor(s), and/or institution(s), if any, in developing the protocol                                                                                              | <input type="checkbox"/>            | <input checked="" type="checkbox"/> | NA             |
| <b>INTRODUCTION</b>               |    |                                                                                                                                                                                                 |                                     |                                     |                |
| <b>Rationale</b>                  | 6  | Describe the rationale for the review in the context of what is already known                                                                                                                   | <input checked="" type="checkbox"/> | <input type="checkbox"/>            | 83-143         |
| <b>Objectives</b>                 | 7  | Provide an explicit statement of the question(s) the review will address with reference to participants, interventions, comparators, and outcomes (PICO)                                        | <input checked="" type="checkbox"/> | <input type="checkbox"/>            | 144-146        |
| <b>METHODS</b>                    |    |                                                                                                                                                                                                 |                                     |                                     |                |

| Section/topic                             | #   | Checklist item                                                                                                                                                                                                                              | Information reported                |                                     | Line number(s) |
|-------------------------------------------|-----|---------------------------------------------------------------------------------------------------------------------------------------------------------------------------------------------------------------------------------------------|-------------------------------------|-------------------------------------|----------------|
|                                           |     |                                                                                                                                                                                                                                             | Yes                                 | No                                  |                |
| <b>Eligibility criteria</b>               | 8   | Specify the study characteristics (e.g., PICO, study design, setting, time frame) and report characteristics (e.g., years considered, language, publication status) to be used as criteria for eligibility for the review                   | <input checked="" type="checkbox"/> | <input type="checkbox"/>            | 148-182        |
| <b>Information sources</b>                | 9   | Describe all intended information sources (e.g., electronic databases, contact with study authors, trial registers, or other grey literature sources) with planned dates of coverage                                                        | <input checked="" type="checkbox"/> | <input type="checkbox"/>            | 184-186        |
| <b>Search strategy</b>                    | 10  | Present draft of search strategy to be used for at least one electronic database, including planned limits, such that it could be repeated                                                                                                  | <input checked="" type="checkbox"/> | <input type="checkbox"/>            | 186-192        |
| <b>STUDY RECORDS</b>                      |     |                                                                                                                                                                                                                                             |                                     |                                     |                |
| Data management                           | 11a | Describe the mechanism(s) that will be used to manage records and data throughout the review                                                                                                                                                | <input checked="" type="checkbox"/> | <input type="checkbox"/>            | 193-196        |
| Selection process                         | 11b | State the process that will be used for selecting studies (e.g., two independent reviewers) through each phase of the review (i.e., screening, eligibility, and inclusion in meta-analysis)                                                 | <input checked="" type="checkbox"/> | <input type="checkbox"/>            | 197-202        |
| Data collection process                   | 11c | Describe planned method of extracting data from reports (e.g., piloting forms, done independently, in duplicate), any processes for obtaining and confirming data from investigators                                                        | <input checked="" type="checkbox"/> | <input type="checkbox"/>            | 203-208        |
| <b>Data items</b>                         | 12  | List and define all variables for which data will be sought (e.g., PICO items, funding sources), any pre-planned data assumptions and simplifications                                                                                       | <input checked="" type="checkbox"/> | <input type="checkbox"/>            | 209-232        |
| <b>Outcomes and prioritization</b>        | 13  | List and define all outcomes for which data will be sought, including prioritization of main and additional outcomes, with rationale                                                                                                        | <input checked="" type="checkbox"/> | <input type="checkbox"/>            | 209-212        |
| <b>Risk of bias in individual studies</b> | 14  | Describe anticipated methods for assessing risk of bias of individual studies, including whether this will be done at the outcome or study level, or both; state how this information will be used in data synthesis                        | <input checked="" type="checkbox"/> | <input type="checkbox"/>            | 234-236        |
| <b>DATA</b>                               |     |                                                                                                                                                                                                                                             |                                     |                                     |                |
| <b>Synthesis</b>                          | 15a | Describe criteria under which study data will be quantitatively synthesized                                                                                                                                                                 | <input checked="" type="checkbox"/> | <input type="checkbox"/>            | 237-251        |
|                                           | 15b | If data are appropriate for quantitative synthesis, describe planned summary measures, methods of handling data, and methods of combining data from studies, including any planned exploration of consistency (e.g., $I^2$ , Kendall's tau) | <input checked="" type="checkbox"/> | <input type="checkbox"/>            | 241-246        |
|                                           | 15c | Describe any proposed additional analyses (e.g., sensitivity or subgroup analyses, meta-regression)                                                                                                                                         | <input checked="" type="checkbox"/> | <input type="checkbox"/>            | 246-251        |
|                                           | 15d | If quantitative synthesis is not appropriate, describe the type of summary planned                                                                                                                                                          | <input checked="" type="checkbox"/> | <input type="checkbox"/>            | 238-239        |
| <b>Meta-bias(es)</b>                      | 16  | Specify any planned assessment of meta-bias(es) (e.g., publication bias across studies, selective reporting within studies)                                                                                                                 | <input type="checkbox"/>            | <input checked="" type="checkbox"/> | NA             |

1  
2  
3  
4  
5  
6  
7  
8  
9  
10  
11  
12  
13  
14  
15  
16  
17  
18  
19  
20  
21  
22  
23  
24  
25  
26  
27  
28  
29  
30  
31  
32  
33  
34  
35  
36  
37  
38  
39  
40  
41  
42  
43  
44  
45  
46

| Section/topic                     | #  | Checklist item                                                                   | Information reported     |                                     | Line number(s) |
|-----------------------------------|----|----------------------------------------------------------------------------------|--------------------------|-------------------------------------|----------------|
|                                   |    |                                                                                  | Yes                      | No                                  |                |
| Confidence in cumulative evidence | 17 | Describe how the strength of the body of evidence will be assessed (e.g., GRADE) | <input type="checkbox"/> | <input checked="" type="checkbox"/> | NA             |

For peer review only



# BMJ Open

## Point-of-care tests for urinary tract infections: Protocol for a systematic review and meta-analysis of diagnostic test accuracy

|                                 |                                                                                                                                                                                                                                                                                                                                                                                                                           |
|---------------------------------|---------------------------------------------------------------------------------------------------------------------------------------------------------------------------------------------------------------------------------------------------------------------------------------------------------------------------------------------------------------------------------------------------------------------------|
| Journal:                        | <i>BMJ Open</i>                                                                                                                                                                                                                                                                                                                                                                                                           |
| Manuscript ID                   | bmjopen-2019-033424.R2                                                                                                                                                                                                                                                                                                                                                                                                    |
| Article Type:                   | Protocol                                                                                                                                                                                                                                                                                                                                                                                                                  |
| Date Submitted by the Author:   | 14-Apr-2020                                                                                                                                                                                                                                                                                                                                                                                                               |
| Complete List of Authors:       | Frailé Navarro, David; University of Saint Andrews School of Medicine<br>Sullivan, Frank; University of St. Andrews, ; North York General hospital,<br><br>Azcoaga-Lorenzo, Amaya; University of Saint Andrews School of<br>Medicine, Division of Population and Behavioural Sciences<br>Hernandez Santiago, Virginia; University of Saint Andrews School of<br>Medicine, Division of Population and Behavioural Sciences |
| <b>Primary Subject Heading</b>: | General practice / Family practice                                                                                                                                                                                                                                                                                                                                                                                        |
| Secondary Subject Heading:      | Infectious diseases, Health services research, Diagnostics                                                                                                                                                                                                                                                                                                                                                                |
| Keywords:                       | Diagnostic microbiology < INFECTIOUS DISEASES, Epidemiology < INFECTIOUS DISEASES, Molecular diagnostics < INFECTIOUS DISEASES, Urinary tract infections < UROLOGY                                                                                                                                                                                                                                                        |
|                                 |                                                                                                                                                                                                                                                                                                                                                                                                                           |

SCHOLARONE™  
Manuscripts



I, the Submitting Author has the right to grant and does grant on behalf of all authors of the Work (as defined in the below author licence), an exclusive licence and/or a non-exclusive licence for contributions from authors who are: i) UK Crown employees; ii) where BMJ has agreed a CC-BY licence shall apply, and/or iii) in accordance with the terms applicable for US Federal Government officers or employees acting as part of their official duties; on a worldwide, perpetual, irrevocable, royalty-free basis to BMJ Publishing Group Ltd ("BMJ") its licensees and where the relevant Journal is co-owned by BMJ to the co-owners of the Journal, to publish the Work in this journal and any other BMJ products and to exploit all rights, as set out in our [licence](#).

The Submitting Author accepts and understands that any supply made under these terms is made by BMJ to the Submitting Author unless you are acting as an employee on behalf of your employer or a postgraduate student of an affiliated institution which is paying any applicable article publishing charge ("APC") for Open Access articles. Where the Submitting Author wishes to make the Work available on an Open Access basis (and intends to pay the relevant APC), the terms of reuse of such Open Access shall be governed by a Creative Commons licence – details of these licences and which [Creative Commons](#) licence will apply to this Work are set out in our licence referred to above.

Other than as permitted in any relevant BMJ Author's Self Archiving Policies, I confirm this Work has not been accepted for publication elsewhere, is not being considered for publication elsewhere and does not duplicate material already published. I confirm all authors consent to publication of this Work and authorise the granting of this licence.

1  
2  
3  
4 **Title:** Point-of-care tests for urinary  
5 tract infections: Protocol for a  
6 systematic review and meta-analysis of  
7 diagnostic test accuracy.  
8  
9  
10  
11  
12  
13  
14

15 **Authors:** Fraile Navarro D, Sullivan F, Azcoaga-Lorenzo A, Hernandez-Santiago V

16 **Affiliation:** University of St Andrews  
17  
18

19 Dr David Fraile Navarro, MSc, MBChB  
20 NHS Education Scotland Academic Fellow in General Practice  
21 University of St Andrews, St Andrews  
22 United Kingdom  
23  
24

25 Dr Frank Sullivan, FRCGP PhD  
26 Professor of Primary Care Head of Division Population & Behavioural Science  
27 Medical School Director of Research  
28 University of St Andrews, St Andrews  
29 United Kingdom  
30  
31  
32

33 Dr Amaya Azcoaga Lorenzo, PhD, MBChB  
34 HDR UK Clinical Postdoctoral Fellow  
35 University of St Andrews, St Andrews  
36 United Kingdom  
37  
38  
39

40 Dr Virginia Hernandez-Santiago\*, PhD, MBChB  
41 NRS Clinical Postdoctoral Fellow,  
42 University of St Andrews, St Andrews  
43 United Kingdom  
44  
45  
46  
47  
48  
49

50 \*Corresponding author: Dr Virginia Hernandez-Santiago, [vhs2@st-andrews.ac.uk](mailto:vhs2@st-andrews.ac.uk)  
51  
52  
53  
54  
55  
56  
57  
58  
59  
60

# ABSTRACT

## Introduction

Urinary tract infections (UTIs) are the second most common type of infection worldwide, accounting for a large number of primary care consultations and antibiotic prescribing. Current diagnosis is based on an empirical approach, relying on symptoms and occasional use of urine dipsticks. The diagnostic reference standard is still urine culture, although it is not routinely recommended for uncomplicated UTIs in the community, due to time to diagnosis (48h). Faster point-of-care tests have been developed, but their diagnostic accuracy has not been compared. Our objective is to systematically review and meta-analyse the diagnostic accuracy of currently available point-of-care tests for urinary tract infections.

## Methods and analysis

Studies evaluating the diagnostic accuracy of point-of-care tests for urinary tract infections will be included. Pubmed, Web of Science, EMBASE and Cochrane Database of Systematic Reviews were searched from inception to the 1<sup>st</sup> June 2019. Data extraction and risk of bias assessment will be assessed using the Quality Assessment of Diagnostic Accuracy Studies (QUADAS-2) tool. Meta-analysis will be performed depending on data availability and heterogeneity.

## Ethics and dissemination

This is a systematic review protocol and therefore formal ethical approval is not required, as no primary, identifiable, personal data will be collected. Patients or the public were not involved in the design of our research. However, the findings from this review will be shared with key stakeholders, including patient groups, clinicians and guideline developers, and will also be presented at national and international conferences.

## Registration

The protocol is registered in PROSPERO, registration number: CRD42018112019

## Keywords

Systematic Review, Urinary Tract Infections, Infectious Diseases, Diagnostic Accuracy, Point-of-care tests.

## Strengths and limitations of this study

- To our knowledge, this is the first systematic review that formally analyses and compares the diagnostic accuracy of currently available point-of-care tests for UTI diagnosis.
- The results from this study will help identify the best available point-of-care test to diagnose UTIs in the primary care setting.
- It is likely significant heterogeneity will be found as all available tests will be explored, and meta-analysis will be performed to account for this.
- Studies involving paediatric population (<18 years old) or populations with certain conditions (detailed in exclusion criteria) will be excluded, as well as studies aimed at screening of asymptomatic bacteriuria, which may affect the generalisability of the results out with these situations.

## INTRODUCTION:

Urinary tract infections (UTIs) are the second most common cause of infection in primary [1] and secondary care [2] and most women experience at least one episode of acute uncomplicated cystitis in their lifetime. In the United Kingdom, UTIs account for 1-3% of all consultations in primary care each year [1]. UTIs are also responsible for a major part of antibiotic prescriptions, accounting for up to 15% of antimicrobial use in the community, with antibiotic use been described as one of the main factors contributing to the emergence of antimicrobial resistance (AMR) [3]. The rise of AMR has been postulated as one of the major challenges for health care worldwide [4]. It is related to increased morbidity, mortality and cost, particularly in vulnerable populations such as the elderly [4]. The World Health Organization Global Action Plan to Reduce Antimicrobial Resistance [5] includes improving antimicrobial use across all human and animal health, and environment settings through a One Health approach. Rates of AMR amongst gram-negative bacteria have progressively increased in the last decade in the European Union [6], with particularly concerning rise of carbapenemase-producing and extended-spectrum-beta-lactamase organisms [7].

Currently, most clinical guidelines recommend that primary care diagnosis and management of uncomplicated UTI should be done empirically [8][9], thus based on clinical symptoms. Although this approach has proven to be cost-effective [10], prescribing without diagnostic certainty increases the use of potentially unnecessary antibiotics, and contributes to the problem of antimicrobial resistance [11]. Up to 90% of patients presenting to primary care with urinary symptoms receive an antibiotic [7,12] but it is usually without further investigation, so it is unclear how many will have a proven infection. Available evidence on how well symptoms predict the presence of a true UTI has shown diverging results, when compared to gold standard (urine culture). The probability of a female patient presenting to primary care with typical UTI symptoms and having a confirmed infection is estimated to be between 50-80%, with the greatest predictability for haematuria, and if combined with a positive urine dipstick [13,14]. Therefore, alternative tests with enhanced diagnostic accuracy could potentially reduce inappropriate antimicrobial use in this context.

The gold standard for UTI diagnosis is urine culture from a midstream, clean urine catch, but as previously mentioned, urine culture is not always performed, especially in primary care and emergency departments, where diagnosis of most UTIs occurs [15]. Urine culture is slow, requiring at least 24-48 hours to report the causative microorganism and provide an antibiotic resistance profile [16], and symptoms are usually distressing enough to prompt on the day empirical management, since acutely unwell patients with UTI symptoms may not be prepared to wait up to 48 hours for a culture result. Current clinical guidelines also advocate empirical treatment if symptoms are sufficiently suggestive of a diagnosis of UTI [9]. Empirical decision-making will often result in the patient getting an antibiotic without infection confirmation. As result of this, different point-of-care tests (POCT) have been

1  
2  
3 developed aiming to provide a more rapid and accurate method for detecting infection.  
4 Point-of-care testing has been defined as ‘a test to support clinical decision making,  
5 performed nearby the patient and on any part of the patient’s body or its derivatives, to  
6 help the patient and healthcare professional upon the best management approach  
7 during or very close to the time of the consultation, with results available at the time of  
8 clinical decision making’ [17]. POCT diagnostic accuracy is influenced dramatically  
9 from pre-test probability in different subpopulations [18] and consequently, its ability  
10 to detect or discard infection can be variable [19][20]. Potentially, an ‘ideal’ POCT  
11 would allow for more timely identification of UTIs, facilitating improved, targeted  
12 treatment, and reduced inappropriate antibiotic use. Indirect methods, such as urine  
13 dipsticks, which detect host inflammatory response rather than bacterial presence,  
14 have become the main POCT for UTIs [21]. Other techniques include culture-based  
15 devices, enzymatic assays and semi-automated urine analysers [22]. Previous reports  
16 suggest that their diagnostic accuracy could be greater than that of simpler urine  
17 dipsticks [16]. These tests could provide relevant information to clinicians to prescribe  
18 antimicrobials more accurately, reducing antibiotic-related harms (including  
19 resistance), and costs [23]. However, it is difficult to ascertain which POCT could be  
20 better for diagnosing UTIs in general and in specific situations.  
21  
22

23  
24 Our aim is to systematically review and meta-analyse the diagnostic test  
25 accuracy of currently available point-of-care tests for urinary tract infections, as  
26 compared to gold standard (urine culture).  
27  
28

## 29 30 31 32 33 **METHODS AND ANALYSIS**

### 34 35 36 37 **Eligibility criteria**

38  
39 Randomized clinical trials (RCTs), cluster RCTs, evaluation studies,  
40 observational studies and regulatory or approval evidence reports (if available),  
41 evaluating point-of-care diagnostic tests for UTI in symptomatic patients versus urine  
42 culture (reference standard) [7] will be included, from both primary or secondary care  
43 settings. No particular index test was pre-specified in our review search criteria, as we  
44 aimed to capture and compare all available tests. However, only those tests that could  
45 be categorised as ‘point-of-care test’ will be included, defined as above [17]. Inclusion  
46 criteria are detailed in **Box 1**, following the PIRD approach (Participants, Index test,  
47 Target condition, Reference standard) for including studies in systematic reviews of  
48 diagnostic test accuracy [24].  
49  
50  
51  
52  
53  
54  
55  
56  
57  
58  
59  
60

### Box 1. Inclusion criteria

|                            |                                           |
|----------------------------|-------------------------------------------|
| <i>Participants:</i>       | Adults                                    |
| <i>Presentation:</i>       | Symptomatic UTIs (variously defined) [13] |
| <i>Index test(s):</i>      | Any point-of-care diagnostic test         |
| <i>Target condition:</i>   | Urinary Tract Infections                  |
| <i>Reference Standard:</i> | Urine culture                             |

The search strategy uses broad terms for defining UTI with the aim of capturing all potentially relevant studies looking at POCT used in symptomatic UTIs. Classical symptoms include those mentioned in Box 1 above, and we will also examine different symptoms / combinations and UTI definition used in each study. Exclusion criteria will be applied and are detailed below. These include:

- Studies evaluating the detection of asymptomatic bacteriuria in pregnancy.
- Studies performed only in children.
- Tests aimed at detecting sexually transmitted infections, or non-bacterial infections (e.g. schistosomiasis).
- Tests based on biomarkers needing laboratory facilities.
- Studies whose main outcome measure is to detect complications of urinary infections (e.g. CT scans or other imaging techniques).
- Clinical algorithms or self-reported symptom tests.
- Specific populations will be excluded: urinary catheterized patients, kidney transplantation, terminal kidney failure or immunocompromised patients, patients with spinal cord injury or neurogenic bladder.

### Information sources & Search

MEDLINE, Web of Science, EMBASE and Cochrane Database of Systematic Reviews were searched from database inception to 1<sup>st</sup> June 2019 with no language restrictions. Only studies involving human health were included. The search included a combination of the following terms: "Urinary Tract Infections/diagnosis", "Diagnostic Tests, Routine", "Point-of-Care Systems", "Point-of-Care Testing", "point-of-care testing", "near-patient testing", "RDT", "poc", "Diagnostic Technics and Procedures", "Techni\* and Procedures, Diagnostic", "rapid diagnostic test\*", AND "Urinary Tract Infections", "Pyuria", "Bacteriuria", "uti", AND "sensitivity", "specificity", "likelihood ratio", "predictive value", "diagnostic accuracy", "AUC", "PPV", "NPV", among other. The full search strategy is available in **Appendix 1** and online in PROSPERO's database [25].



## Data management

Search results will be stored in EndNote version X8.2 bibliography management software. To synthesize and develop study selection, data extraction and quality assessment we will use Covidence platform [26].

## Study selection

Three reviewers (DFN, AAL and VHS) will independently assess study eligibility for inclusion. A calibration exercise assessing 10% of the results by title and abstract will be done in duplicate. After title and abstract screening, selected articles will be screened full-text. Discrepancies will be solved by discussion. Another reviewer will be involved as necessary (FS).

## Data collection process

A standardised data extraction form will be developed. The review team (DFN, AAL and VHS) will independently extract the data from all studies. Study authors will be contacted if no data is available. All articles will be double-extracted, and risk of bias will be double-assessed. Discrepancies will be evaluated and solved by discussion, and if no agreement, a third reviewer will be involved.

## Diagnostic accuracy measures

A 2x2 contingency table with true positives, true negatives, false positives and false negatives will be extracted from each study. Accuracy outcome measures will include: sensitivity, specificity, positive and negative predictive values.

## Definitions for data extraction

From each study, besides the accuracy-related data already specified, we will extract the following predefined set of characteristics:

- Device/Product name.
- Manufacturer/ Country of origin.
- Regulatory approval status in the EU and US.
- Type of sample used (clean urine midstream catch, or other).
- Method principle (culture-based, enzymatic assay, other).
- Analysis time (time required, in minutes).
- Additional training required.
- Need for supplementary equipment (e.g. sterilizer, centrifuge...).
- Cost.
- Type of result provided if the test is positive (presence of infection, bacterial load, antibiotic sensitivity, indirect method for detection).
- The threshold for positivity detection, in Unit Forming Colonies (UFC).

- Population tested.
- UTI definition used.
- Secondary outcomes: Mortality, Hospitalisation, Quality of life (QoL) measures and / or patients' preferences, if reported.

## Risk of bias

Methodological quality assessment will be conducted using the QUADAS-2 tool (Quality Assessment of Diagnostic Accuracy studies) [27].

## Synthesis of results

A narrative description summarising the pre-specified characteristics of each test, and a paired sensitivity-specificity forest plot, will be provided. Meta-analysis will be performed depending on available data, sources of heterogeneity, comparability between methods and ability to aggregate data. If enough data is available, random-effects meta-analysis will be performed for each index test. The bivariate model will be used to ascertain summary sensitivity and specificity if all studies in the group use the same threshold value for positivity. If index tests use different threshold values, the hierarchical summary ROC model will be used instead, to obtain summary sensitivity and specificity for each threshold value. Sources of heterogeneity will be investigated, regarding index test used, threshold for detection, target population included in the study and its given (if reported) pre-test probability. Subgroup analysis will be explored and performed depending on the heterogeneity found and available data, analysing separately studies looking at each POCT, and also different population groups (differentiating adults from elderly patients).

## Patients and Public Involvement

Patients or the public were not involved in the design of our research. However, the findings from this review will be shared with key stakeholders, including patient groups, clinicians and guideline developers, and will also be presented at national and international conferences.

## ETHICS AND DISSEMINATION

Ethical approval was explored with the University of St Andrews School of Medicine Research and Ethics Committee but was not necessary due to the nature of the research (literature review). Results from this review will be shared with key stakeholders, including patient groups, clinicians and guideline developers, and will potentially inform future diagnostic and treatment pathways.

**Authors' contributions:**

VHS conceived the idea. The protocol was developed by DFN, FS, AAL and VHS. DFN performed the search strategy. VHS, DFN and AAL will contribute to design the data extraction form, screen manuscripts, extract data from individual studies and assess study quality. FS will act as a third reviewer in case of discrepancy. DFN redacted the original draft of the protocol. All authors reviewed and contributed to subsequent drafts and read and approved the final draft.

**Funding statement:**

DFN is supported by a NES general practice academic fellowship, AAL is supported by a HDR UK clinical postdoctoral fellowship, VHS is supported by a NRS clinical academic fellowship.

Other than the aforementioned, this research received no other specific grant from any funding agency in the public, commercial or not-for-profit sectors.

**Competing interests' statement:**

The authors declare no competing interests related to the production of this review.

## References

- 1 National Prescribing Centre. Urinary tract infection MeReC Bulletin Volume 17 Number 3. 2006. [http://www.spitalmures.ro/\\_files/protocoale\\_terapeutice/medicina de familie/acute\\_uti\\_final.pdf](http://www.spitalmures.ro/_files/protocoale_terapeutice/medicina_de_familie/acute_uti_final.pdf)
- 2 Lyytikäinen O, Kanerva M, Agthe N, *et al.* Healthcare-associated infections in Finnish acute care hospitals: a national prevalence survey, 2005. *ElsevierPaperpile* <https://www.sciencedirect.com/science/article/pii/S0195670108001199> (accessed 6 Dec 2018).
- 3 McClean P, Tunney M, Gilpin D, *et al.* Antimicrobial Prescribing in Nursing Homes in Northern Ireland. *Drugs Aging* 2011;**28**:819–29. doi:10.2165/11595050-000000000-00000
- 4 Levy SB, Marshall B. Antibacterial resistance worldwide: causes, challenges and responses. *Nat Med* 2004;**10**:S122–9. doi:10.1038/nm1145
- 5 WHO | Global action plan on antimicrobial resistance. WHO Published Online First: 2017. <http://www.who.int/antimicrobial-resistance/publications/global-action-plan/en/#.W-Gmsnm0nA.mendeley> (accessed 6 Nov 2018).
- 6 Ciorba V, Odone A, Veronesi L, *et al.* Antibiotic resistance as a major public health concern: epidemiology and economic impact. *Ann Ig* 2015;**27**:562–79. doi:10.7416/ai.2015.2048
- 7 Scotland. Healthcare Improvement Scotland., Scottish Intercollegiate Guidelines Network. *Management of suspected bacterial urinary tract infection in adults : a national clinical guideline.* Scottish Intercollegiate Guidelines Network (SIGN) 2012. <https://www.sign.ac.uk/sign-88-management-of-suspected-bacterial-urinary-tract-infection-in-adults.html> (accessed 2 Nov 2018).
- 8 Steadman S, Ahmed I, McGarry K, *et al.* Is screening for urine infection in well infants with prolonged jaundice required? Local review and meta-analysis of existing data. *Arch Dis Child* 2016;**101**:614–9. doi:10.1136/archdischild-2015-309265
- 9 National Institute for Healthcare Excellence (NICE). Urinary tract infection (lower): antimicrobial prescribing Guidance. <https://www.nice.org.uk/guidance/ng109#.XdZwkGqjTpQ.mendeley> (accessed 21 Nov 2019).
- 10 Fenwick EA, Briggs AH, Hawke CI. Management of urinary tract infection in general practice: a cost-effectiveness analysis. *Br J Gen Pract* 2000;**50**:635–9. <http://www.ncbi.nlm.nih.gov/pubmed/11042915> (accessed 14 Jun 2019).
- 11 Hernandez-Santiago V, Davey PG, Nathwani D, *et al.* Changes in resistance among coliform bacteraemia associated with a primary care antimicrobial stewardship intervention: A population-based interrupted time series study. *PLOS Med* 2019;**16**:e1002825. doi:10.1371/journal.pmed.1002825
- 12 Fahey T, Webb E, Montgomery AA, *et al.* Clinical management of urinary tract infection in women: a prospective cohort study. *Fam Pract* 2003;**20**:1–6.
- 13 Bent S, Nallamotheu BK, Simel DL, *et al.* Does this woman have an acute uncomplicated urinary tract infection? *JAMA* 2002;**287**:2701–10.
- 14 Giesen LGM, Cousins G, Dimitrov BD, *et al.* Predicting acute uncomplicated urinary tract infection in women: a systematic review of the diagnostic accuracy of symptoms and signs. *BMC Fam Pract* 2010;**11**:78. doi:10.1186/1471-2296-11-78
- 15 Schmiemann G, Kniehl E, Gebhardt K, *et al.* The diagnosis of urinary tract infection: a systematic review. *Dtsch Arztebl Int* 2010;**107**:361–7. doi:10.3238/arztebl.2010.0361
- 16 Baker C. Accident and emergency statistics: demand, performance and pressure. *House Commons Libr* 2017;**6964**:1–32.
- 17 Schols AMR, Dinant G-J, Hopstaken R, *et al.* International definition of a point-of-care test in family practice: a modified e-Delphi procedure. *Fam Pract* 2018;**35**:475–80. doi:10.1093/fampra/cmz134

- 1  
2  
3 18 A.G M, M.D.S D, T.L F, *et al.* Using urine dipstick as a presumptive result for urinary  
4 tract infection. *Clin Chem* 2015;**61**:S196–  
5 S196.<http://www.embase.com/search/results?subaction=viewrecord&from=export&id=L72265463>  
6  
7 19 Hurlbut TA, Littenberg B. The diagnostic accuracy of rapid dipstick tests to predict  
8 urinary tract infection. *Am J Clin Pathol* 1991;**96**:582–  
9 8.<http://www.ncbi.nlm.nih.gov/pubmed/1951183> (accessed 5 Nov 2018).  
10  
11 20 GLASS | Global antimicrobial resistance surveillance system (GLASS) report. *WHO*  
12 Published Online First: 2018.[http://www.who.int/glass/resources/publications/early-](http://www.who.int/glass/resources/publications/early-implementation-report/en/#.W-K8qcwb57U.mendeley)  
13 [implementation-report/en/#.W-K8qcwb57U.mendeley](http://www.who.int/glass/resources/publications/early-implementation-report/en/#.W-K8qcwb57U.mendeley) (accessed 7 Nov 2018).  
14  
15 21 Little P, Moore M V, Turner S, *et al.* Effectiveness of five different approaches in  
16 management of urinary tract infection: randomised controlled trial. *BMJ*  
17 2010;**340**:c199.  
18  
19 22 NIHR Diagnostic Evidence Co-operative Oxford. Point-of-care testing for urinary tract  
20 infections. Horizon Scan Report. Oxford, UK: 2016.  
21  
22 23 Roberts RR, Hota B, Ahmad I, *et al.* Hospital and Societal Costs of  
23 Antimicrobial-Resistant Infections in a Chicago Teaching Hospital: Implications for  
24 Antibiotic Stewardship. *Clin Infect Dis* 2009;**49**:1175–84. doi:10.1086/605630  
25  
26 24 Leeflang MMG, Deeks JJ, Gatsonis C, *et al.* Systematic reviews of diagnostic test  
27 accuracy. *Ann Intern Med* 2008;**149**:889–  
28 97.<http://www.ncbi.nlm.nih.gov/pubmed/19075208> (accessed 6 Dec 2018).  
29  
30 25 Fraile Navarro D, Sullivan F, Hernandez-Santiago V. Search Strategy for “Point-  
31 of-care tests for urinary tract infections: diagnostic test accuracy systematic review  
32 and meta-analysis”; PROSPERO.  
33 2018.[https://www.crd.york.ac.uk/PROSPEROFILES/112019\\_STRATEGY\\_20181113.](https://www.crd.york.ac.uk/PROSPEROFILES/112019_STRATEGY_20181113.pdf)  
34 [pdf](https://www.crd.york.ac.uk/PROSPEROFILES/112019_STRATEGY_20181113.pdf) (accessed 17 Dec 2018).  
35  
36 26 Veritas Health Innovation. Covidence systematic review software. [www.covidence.org](http://www.covidence.org)  
37  
38 27 Whiting PF, Rutjes AWS, Westwood ME, *et al.* QUADAS-2: A Revised Tool for the  
39 Quality Assessment of Diagnostic Accuracy Studies. *Ann Intern Med* 2011;**155**:529.  
40 doi:10.7326/0003-4819-155-8-201110180-00009  
41  
42  
43  
44  
45  
46  
47  
48  
49  
50  
51  
52  
53  
54  
55  
56  
57  
58  
59  
60

## APPENDIX 1 – SEARCH STRATEGY

### PUBMED

((("Urinary Tract Infections/diagnosis"[Mesh]) OR ("Diagnostic Tests, Routine"[Mesh]) OR ("Point-of-Care Systems"[Mesh]) OR ("Point-of-Care Testing"[Mesh]) OR ("point-of-care testing"[tw]) OR ('near-patient testing'[tw]) OR ('RDT'[tiab]) OR ("poct"[tw]) OR ("Diagnostic Technics and Procedures"[Mesh]) OR ("Techni\* and Procedures, Diagnostic"[Mesh]) OR ("rapid diagnostic test\*" [tiab])) AND (("Urinary Tract Infections"[Mesh]) OR ("Pyuria"[Mesh]) OR ("Bacteriuria"[Mesh]) OR ("uti"[tiab])) AND (("sensitivity"[tiab]) OR ("specificity"[tiab]) OR "likelihood ratio"[tiab]) OR ("predictive value"[tiab]) OR ("diagnostic accuracy"[tiab]) OR ("DOR"[tiab]) OR ("AUC"[tiab]) OR ("PPV"[tiab]) OR ("NPV"[tiab]))

### EMBASE

('urinary tract infection\$/exp OR 'uti'/exp OR 'pyuria'/exp OR 'bacteriuria'/exp) AND ('urinary tract infections diagnosis'/exp OR 'rapid diagnostic test'/exp OR 'point of care test'/exp OR 'poct'/exp OR 'near patient'/exp)

### Web of Science

TS=(urinary tract infection\* OR pyuria OR bacteriuria OR uti) AND TS=(point of care OR point-of-care OR near-patient OR diagnostic test\* OR poct) AND TS=(sensitivity OR specificity OR likelihood ratio OR predictive value\* OR diagnostic accuracy OR DOR OR AUC OR PPV OR NPV)

### Cochrane Database of Systematic Reviews

“Urinary tract infections” AND “diagnosis”

## PRISMA-P 2015 Checklist

This checklist has been adapted for use with protocol submissions to *Systematic Reviews* from Table 3 in Moher D et al: Preferred reporting items for systematic review and meta-analysis protocols (PRISMA-P) 2015 statement. *Systematic Reviews* 2015 4:1

| Section/topic                     | #  | Checklist item                                                                                                                                                                                                            | Information reported                |                                     | Line number(s) |
|-----------------------------------|----|---------------------------------------------------------------------------------------------------------------------------------------------------------------------------------------------------------------------------|-------------------------------------|-------------------------------------|----------------|
|                                   |    |                                                                                                                                                                                                                           | Yes                                 | No                                  |                |
| <b>ADMINISTRATIVE INFORMATION</b> |    |                                                                                                                                                                                                                           |                                     |                                     |                |
| <b>Title</b>                      |    |                                                                                                                                                                                                                           |                                     |                                     |                |
| Identification                    | 1a | Identify the report as a protocol of a systematic review                                                                                                                                                                  | <input checked="" type="checkbox"/> | <input type="checkbox"/>            | 1-4            |
| Update                            | 1b | If the protocol is for an update of a previous systematic review, identify as such                                                                                                                                        | <input type="checkbox"/>            | <input checked="" type="checkbox"/> | NA             |
| <b>Registration</b>               | 2  | If registered, provide the name of the registry (e.g., PROSPERO) and registration number in the Abstract                                                                                                                  | <input checked="" type="checkbox"/> | <input type="checkbox"/>            | 63             |
| <b>Authors</b>                    |    |                                                                                                                                                                                                                           |                                     |                                     |                |
| Contact                           | 3a | Provide name, institutional affiliation, and e-mail address of all protocol authors; provide physical mailing address of corresponding author                                                                             | <input type="checkbox"/>            | <input type="checkbox"/>            | 5-32           |
| Contributions                     | 3b | Describe contributions of protocol authors and identify the guarantor of the review                                                                                                                                       | <input checked="" type="checkbox"/> | <input type="checkbox"/>            | 269-275        |
| <b>Amendments</b>                 | 4  | If the protocol represents an amendment of a previously completed or published protocol, identify as such and list changes; otherwise, state plan for documenting important protocol amendments                           | <input type="checkbox"/>            | <input checked="" type="checkbox"/> | NA             |
| <b>Support</b>                    |    |                                                                                                                                                                                                                           |                                     |                                     |                |
| Sources                           | 5a | Indicate sources of financial or other support for the review                                                                                                                                                             | <input checked="" type="checkbox"/> | <input type="checkbox"/>            | 276-281        |
| Sponsor                           | 5b | Provide name for the review funder and/or sponsor                                                                                                                                                                         | <input type="checkbox"/>            | <input checked="" type="checkbox"/> | NA             |
| Role of sponsor/funder            | 5c | Describe roles of funder(s), sponsor(s), and/or institution(s), if any, in developing the protocol                                                                                                                        | <input type="checkbox"/>            | <input checked="" type="checkbox"/> | NA             |
| <b>INTRODUCTION</b>               |    |                                                                                                                                                                                                                           |                                     |                                     |                |
| <b>Rationale</b>                  | 6  | Describe the rationale for the review in the context of what is already known                                                                                                                                             | <input checked="" type="checkbox"/> | <input type="checkbox"/>            | 83-146         |
| <b>Objectives</b>                 | 7  | Provide an explicit statement of the question(s) the review will address with reference to participants, interventions, comparators, and outcomes (PICO)                                                                  | <input checked="" type="checkbox"/> | <input type="checkbox"/>            | 144-146        |
| <b>METHODS</b>                    |    |                                                                                                                                                                                                                           |                                     |                                     |                |
| <b>Eligibility criteria</b>       | 8  | Specify the study characteristics (e.g., PICO, study design, setting, time frame) and report characteristics (e.g., years considered, language, publication status) to be used as criteria for eligibility for the review | <input checked="" type="checkbox"/> | <input type="checkbox"/>            | 148-182        |



| Section/topic                      | #   | Checklist item                                                                                                                                                                                                                              | Information reported                |                                     | Line number(s) |
|------------------------------------|-----|---------------------------------------------------------------------------------------------------------------------------------------------------------------------------------------------------------------------------------------------|-------------------------------------|-------------------------------------|----------------|
|                                    |     |                                                                                                                                                                                                                                             | Yes                                 | No                                  |                |
| Information sources                | 9   | Describe all intended information sources (e.g., electronic databases, contact with study authors, trial registers, or other grey literature sources) with planned dates of coverage                                                        | <input checked="" type="checkbox"/> | <input type="checkbox"/>            | 183-194        |
| Search strategy                    | 10  | Present draft of search strategy to be used for at least one electronic database, including planned limits, such that it could be repeated                                                                                                  | <input checked="" type="checkbox"/> | <input type="checkbox"/>            | 183-194        |
| <b>STUDY RECORDS</b>               |     |                                                                                                                                                                                                                                             |                                     |                                     |                |
| Data management                    | 11a | Describe the mechanism(s) that will be used to manage records and data throughout the review                                                                                                                                                | <input checked="" type="checkbox"/> | <input type="checkbox"/>            | 195-198        |
| Selection process                  | 11b | State the process that will be used for selecting studies (e.g., two independent reviewers) through each phase of the review (i.e., screening, eligibility, and inclusion in meta-analysis)                                                 | <input checked="" type="checkbox"/> | <input type="checkbox"/>            | 199-204        |
| Data collection process            | 11c | Describe planned method of extracting data from reports (e.g., piloting forms, done independently, in duplicate), any processes for obtaining and confirming data from investigators                                                        | <input checked="" type="checkbox"/> | <input type="checkbox"/>            | 205-210        |
| Data items                         | 12  | List and define all variables for which data will be sought (e.g., PICO items, funding sources), any pre-planned data assumptions and simplifications                                                                                       | <input checked="" type="checkbox"/> | <input type="checkbox"/>            | 211-234        |
| Outcomes and prioritization        | 13  | List and define all outcomes for which data will be sought, including prioritization of main and additional outcomes, with rationale                                                                                                        | <input checked="" type="checkbox"/> | <input type="checkbox"/>            | 211-214        |
| Risk of bias in individual studies | 14  | Describe anticipated methods for assessing risk of bias of individual studies, including whether this will be done at the outcome or study level, or both; state how this information will be used in data synthesis                        | <input checked="" type="checkbox"/> | <input type="checkbox"/>            | 236-238        |
| <b>DATA</b>                        |     |                                                                                                                                                                                                                                             |                                     |                                     |                |
| Synthesis                          | 15a | Describe criteria under which study data will be quantitatively synthesized                                                                                                                                                                 | <input checked="" type="checkbox"/> | <input type="checkbox"/>            | 239-253        |
|                                    | 15b | If data are appropriate for quantitative synthesis, describe planned summary measures, methods of handling data, and methods of combining data from studies, including any planned exploration of consistency (e.g., $I^2$ , Kendall's tau) | <input checked="" type="checkbox"/> | <input type="checkbox"/>            | 244-250        |
|                                    | 15c | Describe any proposed additional analyses (e.g., sensitivity or subgroup analyses, meta-regression)                                                                                                                                         | <input checked="" type="checkbox"/> | <input type="checkbox"/>            | 250-253        |
|                                    | 15d | If quantitative synthesis is not appropriate, describe the type of summary planned                                                                                                                                                          | <input checked="" type="checkbox"/> | <input type="checkbox"/>            | 240-243        |
| Meta-bias(es)                      | 16  | Specify any planned assessment of meta-bias(es) (e.g., publication bias across studies, selective reporting within studies)                                                                                                                 | <input type="checkbox"/>            | <input checked="" type="checkbox"/> | NA             |
| Confidence in cumulative evidence  | 17  | Describe how the strength of the body of evidence will be assessed (e.g., GRADE)                                                                                                                                                            | <input type="checkbox"/>            | <input checked="" type="checkbox"/> | NA             |
