# Supplementary material for: Point-of-care tests for urinary tract infections: protocol for a systematic review and meta-analysis of diagnostic test accuracy
Source: PubMed Central journal article supplement — BMJ Open. 2020 Jun 3;10(6):e033424. doi: 10.1136/bmjopen-2019-033424 (PMC7282288; doi:10.1136/bmjopen-2019-033424), 2020-06-03
Supplement: bmjopen-2019-033424supp001.pdf [file bmjopen-2019-033424supp001.pdf]

## APPENDIX 1 – SEARCH STRATEGY

### PUBMED

("Urinary Tract Infections/diagnosis"[Mesh]) OR ("Diagnostic Tests, Routine"[Mesh]) OR ("Point-of-Care Systems"[Mesh]) OR ("Point-of-Care Testing"[Mesh]) OR ("point-of-care testing"[tw]) OR ('near-patient testing'[tw]) OR ('RDT'[tiab]) OR ("poc"[tw]) OR ("Diagnostic Technics and Procedures"[Mesh]) OR ("Techni\* and Procedures, Diagnostic"[Mesh]) OR ("rapid diagnostic test\*"[tiab])) AND (("Urinary Tract Infections"[Mesh]) OR ("Pyuria"[Mesh]) OR ("Bacteriuria"[Mesh]) OR ("uti"[tiab])) AND (("sensitivity"[tiab]) OR ("specificity"[tiab]) OR "likelihood ratio"[tiab]) OR ("predictive value"[tiab]) OR ("diagnostic accuracy"[tiab]) OR ("DOR"[tiab]) OR ("AUC"[tiab]) OR ("PPV"[tiab]) OR ("NPV"[tiab]))

### EMBASE

('urinary tract infection\$/exp OR 'uti'/exp OR 'pyuria'/exp OR 'bacteriuria'/exp) AND ('urinary tract infections diagnosis'/exp OR 'rapid diagnostic test'/exp OR 'point of care test'/exp OR 'poc'/exp OR 'near patient'/exp)

### Web of Science

TS=(urinary tract infection\* OR pyuria OR bacteriuria OR uti) AND TS=(point of care OR point-of-care OR near-patient OR diagnostic test\* OR poc) AND TS=(sensitivity OR specificity OR likelihood ratio OR predictive value\* OR diagnostic accuracy OR DOR OR AUC OR PPV OR NPV)

### Cochrane Database of Systematic Reviews

“Urinary tract infections” AND “diagnosis”
